# Supplementary material for: Tenascin-C Protects Cancer Stem–like Cells from Immune Surveillance by Arresting T-cell Activation
Source: Oxford University Press journal article supplement (doi:10.1158/0008-5472.can-14-2346), 2015-03-26
Supplement: 00085472can142346-sup-136123_2_supp_0_nlh48n.docx [file 00085472can142346-sup-136123_2_supp_0_nlh48n.docx]

**SUPPLEMENTARY TABLE S2**

| **OT1 - TPIN-SC(CD62Lhi)/OT1 - TNE-SC(CD62Llo)** | | | | | | |
| --- | --- | --- | --- | --- | --- | --- |
| Pathways mapped in upregulated proteins in OT1 - TPIN-SC(CD62Lhi) | | | | | | |
| **GO_id** | **Term** | **Number**  **Of Genes** | **p-value** | **p-value_fdr** | **P value_**  **bonferroni** | **Mapped proteins** | |
| mmu00010 | Glycolysis / Gluconeogenesis | 7 | 3,48E-08 | 0,00000724 | 0,00000724 | Pgam1; Pfkl; Ldha; Pgk1; Eno1; Pkm2; Tpi1 | |
| mmu04210 | Apoptosis | 3 | 0,0061 | 0,585 | 1 | Capn2; Casp6; Casp3 | |
| mmu00051 | Fructose and mannose metabolism | 2 | 0,0105 | 0,585 | 1 | Pfkl; Tpi1 | |
| mmu00620 | Pyruvate metabolism | 2 | 0,0135 | 0,585 | 1 | Pkm2; Ldha | |
| mmu05146 | Amoebiasis | 3 | 0,0141 | 0,585 | 1 | Serpinb9; Casp3; Actn1 | |
| mmu00562 | Inositol phosphate metabolism | 2 | 0,0251 | 0,872 | 1 | Impa2; Tpi1 | |
| mmu04146 | Peroxisome | 2 | 0,0437 | 1 | 1 | Dhrs4; Prdx5 | |

**Supplementary Table S2.** Kegg enrichment of proteins upregulated in T cells cultured in the presence of TPIN-SCs.
